# Supplementary material for: Unravelling Anti-Melanogenic Potency of Edible Mushrooms Laetiporus sulphureus and Agaricus silvaticus In Vivo Using the Zebrafish Model
Source: MDPI journal article supplement (doi:10.3390/jof7100834), 2021-10-05
Supplement: s1 [file s1]

**Table S1.** Lethal and teratogenic effects observed in zebrafish (*Danio rerio*) embryos at different hours post fertilization (hpf).

| Category           | Developmental Endpoints                       | Exposure Time (hpf) |    |    |        |
|--------------------|-----------------------------------------------|---------------------|----|----|--------|
|                    |                                               | 24                  | 48 | 72 | 96/120 |
| Lethal effect      | Coagulated eggs <sup>a</sup>                  | •                   | •  | •  | •      |
|                    | Lack of the heart beating                     | •                   | •  | •  | •      |
| Teratogenic effect | Malformation of head                          | •                   | •  | •  | •      |
|                    | Malformation of eyes <sup>b</sup>             | •                   | •  | •  | •      |
|                    | Malformation of sacculi/otoliths <sup>c</sup> | •                   | •  | •  | •      |
|                    | Malformation of chorda                        | •                   | •  | •  | •      |
|                    | Malformation of tail <sup>d</sup>             | •                   | •  | •  | •      |
|                    | Scoliosis                                     | •                   | •  | •  | •      |
|                    | Yolk edema                                    | •                   | •  | •  | •      |
|                    | Liver necrosis                                |                     |    | •  | •      |
|                    | Yolk deformation                              | •                   | •  | •  | •      |
|                    | Growth retardation <sup>e</sup>               |                     | •  | •  | •      |
|                    | Hatching                                      |                     |    | •  | •      |
| Cardiotoxicity     | Pericardial edema                             |                     | •  | •  | •      |
|                    | Heart morphology                              |                     |    | •  | •      |
|                    | Heart beating rate (beat/min)                 |                     |    |    | •      |

<sup>a</sup> No clear organs structure is recognized. <sup>b</sup> Malformation of eyes was recorded for the retardation in eye development and abnormality in shape and size. <sup>c</sup> Presence of none, one or more than two otoliths per sacculus, as well as reduction and enlargement of otoliths and/or sacculi (otic vesicles). <sup>d</sup> Tail malformation was recorded when the tail was bent, twisted or shorter than to control embryos as assessed by optical comparison. <sup>e</sup> Growth retardation was recorded by comparing with the control embryos in a body length (after hatching, at and onwards 72 hpf) using by optical comparison using an inverted microscope (CKX41; Olympus, Tokyo, Japan).
